# Supplementary material for: Co-expression of AFAP1-AS1 and PD-1 predicts poor prognosis in nasopharyngeal carcinoma
Source: PubMed Central journal article supplement (PMC5503590; doi:10.18632/oncotarget.16545), 2017-03-24
Supplement: oncotarget-08-39001-s001.pdf [file oncotarget-08-39001-s001.pdf]

## **Co-expression of AFAP1-AS1 and PD-1 predicts poor prognosis in nasopharyngeal carcinoma**

### **SUPPLEMENTARY TABLES**

**Supplementary Table 1: Clinicopathological data and expression levels of *AFAP1-AS1* and *PD-1*.**

**Supplementary File 1**

**Supplementary Table 2: Correlation of clinical parameters with *AFAP1-AS1* and *PD-1* in nasopharyngeal carcinoma.**

**Supplementary File 2**
